# Supplementary material for: Mutations in INPP5K Cause a Form of Congenital Muscular Dystrophy Overlapping Marinesco-Sjögren Syndrome and Dystroglycanopathy
Source: PubMed Central journal article supplement — Am J Hum Genet. 2017 Feb 9;100(3):537–45. doi: 10.1016/j.ajhg.2017.01.019 (PMC5339112; doi:10.1016/j.ajhg.2017.01.019), 2017-02-09
Supplement: mmc8.pdf [file mmc8.pdf]

# Mutations in *INPP5K* Cause a Form of Congenital Muscular Dystrophy Overlapping Marinesco-Sjögren Syndrome and Dystroglycanopathy

Daniel P.S. Osborn,<sup>1</sup> Heather L. Pond,<sup>2</sup> Neda Mazaheri,<sup>3,4</sup> Jeremy DeJardin,<sup>1</sup> Christopher J. Munn,<sup>5</sup> Khaloob Mushref,<sup>2</sup> Edmund S. Cauley,<sup>2</sup> Isabella Moroni,<sup>6</sup> Maria Barbara Pasanisi,<sup>6,7</sup> Elizabeth A. Sellars,<sup>8</sup> R. Sean Hill,<sup>9,10</sup> Jennifer N. Partlow,<sup>9,10</sup> Rebecca K. Willaert,<sup>11</sup> Jaipreet Bharj,<sup>1</sup> Reza Azizi Malamiri,<sup>12</sup> Hamid Galehdari,<sup>3,4</sup> Gholamreza Shariati,<sup>4,13</sup> Reza Maroofian,<sup>1,14</sup> Marina Mora,<sup>7</sup> Laura E. Swan,<sup>5</sup> Thomas Voit,<sup>15</sup> Francesco J. Conti,<sup>15</sup> Yalda Jamshidi,<sup>1,16,\*</sup> and M. Chiara Manzini<sup>2,16,\*</sup>

Congenital muscular dystrophies display a wide phenotypic and genetic heterogeneity. The combination of clinical, biochemical, and molecular genetic findings must be considered to obtain the precise diagnosis and provide appropriate genetic counselling. Here we report five individuals from four families presenting with variable clinical features including muscular dystrophy with a reduction in dystroglycan glycosylation, short stature, intellectual disability, and cataracts, overlapping both the dystroglycanopathies and Marinesco-Sjögren syndrome. Whole-exome sequencing revealed homozygous missense and compound heterozygous mutations in *INPP5K* in the affected members of each family. *INPP5K* encodes the inositol polyphosphate-5-phosphatase K, also known as *SKIP* (skeletal muscle and kidney enriched inositol phosphatase), which is highly expressed in the brain and muscle. *INPP5K* localizes to both the endoplasmic reticulum and to actin ruffles in the cytoplasm. It has been shown to regulate myoblast differentiation and has also been implicated in protein processing through its interaction with the ER chaperone HSPA5/BiP. We show that morpholino-mediated *inpp5k* loss of function in the zebrafish results in shortened body axis, microphthalmia with disorganized lens, microcephaly, reduced touch-evoked motility, and highly disorganized myofibers. Altogether these data demonstrate that mutations in *INPP5K* cause a congenital muscular dystrophy syndrome with short stature, cataracts, and intellectual disability.

Congenital muscular dystrophy (CMD) encompasses a group of disorders characterized by muscle weakness and progressive loss of muscle mass and function, presenting at birth or infancy.<sup>1,2</sup> Multiple forms of CMDs are also associated with cerebral and ocular phenotypes, suggesting common mechanisms affecting development of the muscle, brain, and eye. For these syndromic forms, gene identification studies have primarily pointed to a molecular mechanism involving interactions between cells and the surrounding extracellular matrix (ECM).<sup>3</sup> Mutations in up to 19 glycosyltransferases and accessory proteins involved in the glycosylation of the transmembrane glycoprotein dystroglycan (*DAG1* [MIM:128239]) lead to a spectrum of CMDs termed dystroglycanopathies.<sup>4,5</sup> Dystroglycanopathy-associated genes function in the endoplasmic reticulum (ER) and/or Golgi apparatus to regulate dystroglycan glycosylation. Genetic and function studies have shown that glycans are critical to control normal tissue development in the brain, eye, and muscle, via interac-

tions with the ECM.<sup>5</sup> The most severe forms of dystroglycanopathy present with CMD associated with lissencephaly (smooth brain) and a variety of eye malformations affecting both the retina and the anterior chamber (e.g., cataracts, glaucoma), but multiple case subjects have only CMD with intellectual disability and more subtle brain findings.<sup>6,7</sup>

Marinesco-Sjögren syndrome (MSS [MIM:248800]) is a form of myopathy with a similar constellation of findings including muscle involvement, intellectual disability, cataracts, brain MRI findings, and other signs of central nervous system (CNS) involvement.<sup>8,9</sup> Cerebellar atrophy is often considered the most prominent neuroradiologic finding in MSS, but it is not an obligatory finding.<sup>10</sup> The clinical overlap can therefore make it difficult to distinguish between syndromic CMDs and MSS. MSS is also considered to be a clinically and genetically heterogeneous disorder with approximately 70% of MSS-affected case subjects harboring mutations in *SIL1* (MIM: 608005).<sup>8</sup>

<sup>1</sup>Cardiovascular and Cell Sciences Institute, St George's University of London, Cranmer Terrace, London SW17 0RE, UK; <sup>2</sup>Department of Pharmacology and Physiology, The George Washington University School of Medicine and Health Science, Washington, DC 20037, USA; <sup>3</sup>Department of Genetics, Shahid Chamran University of Ahvaz, Ahvaz 6135783151, Iran; <sup>4</sup>Narges Medical Genetics and Prenatal Diagnosis Laboratory, East Mihan Ave., Kianpars, Ahvaz 6155689467, Iran; <sup>5</sup>Department of Cellular and Molecular Physiology, Institute of Translational Medicine, University of Liverpool, Liverpool L69 3BX, UK; <sup>6</sup>Pediatric Neurology Unit, Fondazione IRCCS Istituto Neurologico C. Besta, 20133 Milan, Italy; <sup>7</sup>Division of Neuromuscular Diseases and Neuroimmunology, Fondazione IRCCS Istituto Neurologico C. Besta, 20126 Milan, Italy; <sup>8</sup>Department of Pediatrics, Section of Genetics and Metabolism, University of Arkansas for Medical Sciences, Arkansas Children's Hospital, Little Rock, AR 72202, USA; <sup>9</sup>Program in Genetics and Genomics, Boston Children's Hospital, Boston, MA 02115, USA; <sup>10</sup>Howard Hughes Medical Institute, Boston Children's Hospital, Boston, MA 02115, USA; <sup>11</sup>GeneDX, Gaithersburg, MD 20877, USA; <sup>12</sup>Department of Paediatric Neurology, Golestan Medical, Educational, and Research Center, Ahvaz Jundishapur University of Medical Sciences, Ahvaz 6163764648, Iran; <sup>13</sup>Department of Medical Genetics, Faculty of Medicine, Ahvaz Jundishapur, University of Medical Sciences, Ahvaz 6135715794, Iran; <sup>14</sup>University of Exeter Medical School, RILD Wellcome Wolfson Centre, Royal Devon & Exeter NHS Foundation Trust, Exeter EX1 2LU, UK; <sup>15</sup>NIHR GOSH Biomedical Research Centre, Great Ormond Street Institute of Child Health, University College London, London WC1N 1EH, UK

<sup>16</sup>These authors contributed equally to this work

\*Correspondence: [yjamshid@sgul.ac.uk](mailto:yjamshid@sgul.ac.uk) (Y.J.), [cmanzini@gwu.edu](mailto:cmanzini@gwu.edu) (M.C.M.)

<http://dx.doi.org/10.1016/j.ajhg.2017.01.019>

© 2017 The Author(s). This is an open access article under the CC BY-NC-ND license (<http://creativecommons.org/licenses/by-nc-nd/4.0/>).

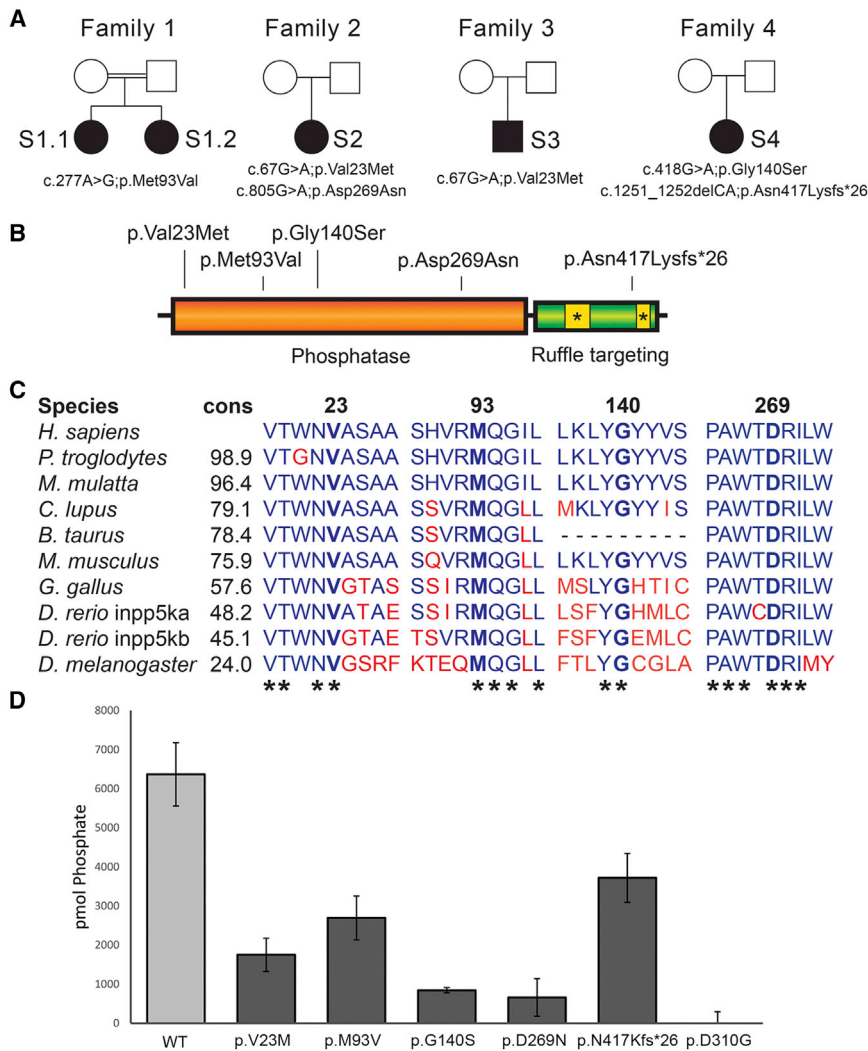

**Figure 1. Mutations in *INPP5K* Severely Disrupt Protein Function**

(A) Pedigrees of families 1 to 4 where five autosomal-recessive alleles in *INPP5K* have been identified by exome sequencing. (B) Four missense mutations are localized to the phosphatase domain in *INPP5K*, while a C-terminal frameshift affects the last actin ruffle targeting domain.

(C) Protein conservation in the four *INPP5K* amino acids altered by the identified missense mutations. Percent conservation (cons) to the human gene is shown and asterisk (\*) indicates conservation across all species listed.

(D) Phosphatase activity was measured by using malachite green dye to detect GST-*INPP5K*-mediated phosphate release in the presence of the soluble lipid substrate PI(4,5)P<sub>2</sub> diC<sub>8</sub>, showing that all reported mutations compromise the enzymatic activity of *INPP5K*. Results of three independent experiments were presented as mean ± standard deviation. See Table 1 for numeric values.

SIL1 acts as a nucleotide exchange factor for heat shock protein family A member 5 (HSPA5) (also known as GRP78 [glucose-related protein 78] or BiP [immunoglobulin binding protein]), an essential regulator of ER function; the identification of these mutations has led to the suggestion that MSS is a disorder of protein biosynthesis or processing in the ER.<sup>11</sup>

In this report, we present five individuals from four families diagnosed with a syndrome overlapping both the dystroglycanopathy and the MSS spectrum with recessive mutations in inositol polyphosphate-5-phosphatase K (*INPP5K* [MIM:607875]) (Figure 1). *INPP5K* belongs to a family of phosphatidylinositol (PI) phosphatases responsible for removing the phosphate on position 5 of the inositol ring leading to PI(3,4)P<sub>2</sub> from PI(3,4,5)P<sub>3</sub> and PI4P from PI(4,5)P<sub>2</sub>. Also known as skeletal muscle and kidney-enriched inositol phosphatase (*SKIP*), *INPP5K* is highly expressed in the developing and adult brain, eye, and muscle.<sup>12–14</sup> It is primarily localized to the ER, and it can form a complex with HSPA5/BiP to regulate insulin receptor signaling at actin ruffles on the plasma membrane by acting as a negative regulator of phosphatidylinositol-3-ki-

nase (PI3K) signaling,<sup>15</sup> suggesting a possible overlap with the function of the MSS-associated gene *SIL1*.

In agreement with the Declaration of Helsinki, informed consent for genetic and biochemical studies was obtained from all study participants or their guardians under the authority of the George Washington University Internal Review Board and the Narges Medical Genetics and Prenatal Diagnosis Laboratory. Subjects 1.1 and

1.2 (S1.1 and S1.2; Figure 1A, Table 1) are two affected sisters (7 and 13 years old) born of an Arabian consanguineous family in Iran, who were initially diagnosed with muscle atrophy and global developmental delay. Both were born without complications, and early development was normal with the exception of delayed walking from 18 months after a period of occupational therapy. Both sisters experienced febrile seizures in infancy (9 months) and early childhood (2 years), and routine interictal electroencephalography in the elder sister was normal. They displayed difficulty rising from a squatting position, impaired toe-standing, and unsteady gait. At the age of 2 years the elder sister began to show hypotonicity that progressed to spasticity including diffuse loss of muscle bulk, exaggerated deep tendon reflexes, positive pyramidal signs, and fatty infiltration resulting in frequent falls, toe walking, spastic gait, and pronounced hyperlordosis. Neither sister can climb stairs without support. After orthopedic surgery, the elder sister uses a wheelchair and muscle biopsy showed myogenic atrophy. Electromyogram (EMG) report also showed the presence of myopathy involving both her lower limbs, with more involvement of the proximal

**Table 1. Clinical Features of Individuals with Biallelic *INPP5K* Mutations**

| Subject                 | S1.1              | S1.2             | S2                               | S3                               | S4                               |
|-------------------------|-------------------|------------------|----------------------------------|----------------------------------|----------------------------------|
| Protein change          | p.Met93Val        | p.Met93Val       | p.Val23Met; p.Asp269Asn          | p.Val23Met                       | p.Gly140Ser;<br>p.Asn417Lysfs*26 |
| % WT function           | 42% ± 9%          | 42% ± 9%         | 27% ± 7%; 10% ± 8%               | 27% ± 7%                         | 13% ± 1%; 58% ± 10%              |
| Ethnic origin           | Iranian-Arab      | Iranian-Arab     | Italian                          | Italian                          | European American                |
| Sex                     | F                 | F                | F                                | M                                | F                                |
| Current age             | 13 y              | 7 y              | 31 y                             | 21 y                             | 17 y                             |
| Short stature           | +                 | +                | +                                | +                                | +                                |
| Cataracts               | –                 | +                | +                                | –                                | +                                |
| Strabismus              | +                 | +                | –                                | –                                | +                                |
| Spine hyperlordosis     | +                 | +                | –                                | +                                | –                                |
| Muscle weakness         | +                 | +                | +                                | +                                | +                                |
| CK                      | 1,041 U/L         | 1,184 U/L        | elevated                         | >1,000 U/L                       | elevated                         |
| EMG                     | myopathic changes | NA               | myopathic changes                | myopathic changes                | NA                               |
| Muscle biopsy           | myogenic atrophy  | NA               | dystrophic; reduced $\alpha$ -DG | dystrophic; reduced $\alpha$ -DG | NA                               |
| Spasticity              | +                 | +                | +/-                              | –                                | +                                |
| Mobility                | wheelchair-bound  | assisted walking | wheelchair-bound                 | wheelchair-bound                 | ambulatory                       |
| Intellectual disability | moderate/severe   | moderate/severe  | moderate/severe                  | moderate                         | moderate                         |
| Seizures                | +                 | +                | +                                | –                                | –                                |
| Microcephaly            | borderline        | +                | –                                | +                                | +                                |
| MRI                     | normal            | NA               | brain atrophy                    | normal                           | normal                           |

Abbreviations are as follows: WT, wild type; y, years; NA, not assessed;  $\alpha$ -DG,  $\alpha$ -dystroglycan.

muscles. Both sisters have increased serum creatine kinase (CK), aldolase, and alkaline phosphatase levels. They have moderate to severe intellectual disability (ID), both attending special schools. Brain magnetic resonance imaging (MRI) of S1.1 was normal at the ages of 8 and 13. Both sisters have short stature, microcephaly, and impaired speech. Variable clinical features include bilateral cataracts in S1.2.

Whole-exome sequencing (see Table S1 for details) was performed on S1.1, focusing on the identification of potentially deleterious rare homozygous variants due to the presence of multiple large regions of homozygosity. Thirteen candidate genes were identified with homozygous missense mutations (Table S2). A homozygous variant in *INPP5K* (GenBank: NM\_016532; Table S3) was identified within an 8-Mb region of homozygosity (c.277A>G [p.Met93Val]) (Figures 1A and 1B). Sanger sequencing confirmed that both affected children were homozygous for this variant and each parent was heterozygous for the variant. The variant is unique in an in-house dataset of 450 geographically matched individuals sequenced by exome and is not represented in the Greater Middle Eastern Variome,<sup>16</sup> in 60,706 individuals in the Exome Aggregation Consortium (ExAC) Browser,<sup>17</sup> or in 141,353 individuals in the Genome Aggregation Database (gnomAD). This mutation affects a highly conserved

residue (Figure 1C) and is predicted to be pathogenic by multiple prediction tools (SIFT = 0.01; CADD = 22.7)<sup>18</sup> (Table S3).

Subjects 2 (S2) and 3 (S3) were simplex cases originating from southern Italy. S2 (Figure 1A, Table 1) is 31 years old and was referred with a diagnosis of CMD as a child. She was born at term with low birth weight and presented with motor and cognitive delay since early infancy. At 2 years of age, she underwent surgery for bilateral cataracts. Upon neuromuscular examination at age 5, she was able to walk independently, but her upper limbs were hypotonic and hypotrophic with no tendon reflexes and her lower limbs were slightly hypertonic with brisk tendon reflexes. CK and aldolase levels were reported as higher than normal. EMG revealed myopathic changes with normal sensory and motor conduction velocities. A biopsy of the quadriceps muscle showed neuromyogenic changes. Fiber diameter was variable, with several small rounded or wedge-shaped fibers, mildly increased perimysial connective tissue, rare centrally located nuclei, and a few degenerating and regenerating fibers (H&E staining, Figure 2A).  $\alpha$ -dystroglycan immunohistochemistry using either the VIA4-1 or IIH6 antibody (Millipore) showed reduced protein glycosylation on fiber surfaces (Figure 2C). Dystrophin-associated glycoproteins and laminin- $\alpha$ 2 were normally expressed (not shown). In addition

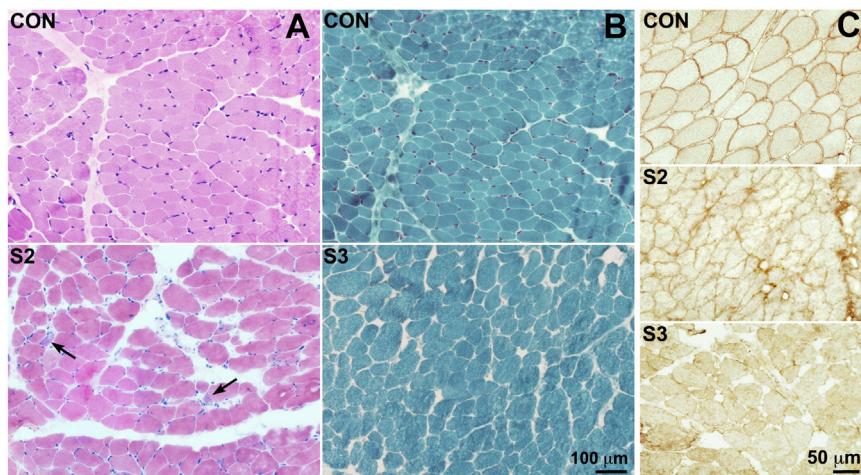

**Figure 2. Muscular Dystrophy and Loss of Dystroglycan Glycosylation in Subjects S2 and S3**

(A and B) Haematoxylin and eosin (H&E) staining (A) from normal control subject (con) and subject S2 and Gomori trichrome staining (B) from control (con) and subject S3. Both biopsies show great fiber size variability, and increased perimysial connective tissue and regenerating fibers are indicated by arrows in S2. Scale bar represents 100  $\mu\text{m}$ .

(C) Immunostaining of  $\alpha$ -dystroglycan glycosylation in muscle biopsies from S2 and S3, showing reduced and irregular protein expression in the affected individuals compared to the control subject (con). Scale bar represents 50  $\mu\text{m}$ .

to the neuromuscular phenotype, she presented with dysmorphic features: short stature, thin hair, globular nose, and micrognathism, plus skeletal anomalies such as 13 ribs and scoliosis. A cerebral CT showed an elongated (dolichocephalic) skull, with underdevelopment of both cortex and white matter of cerebral hemispheres. She was treated for focal seizures until she was 10 years old. A brain MRI, performed at age 18 years, showed an anomaly of the craniovertebral junction (odontoid process in the foramen magnum) and enlarged lateral ventricles and subarachnoid spaces, suggesting progressive brain atrophy. During follow-ups, the subject's clinical features remained stable. She presents with moderate-severe ID without speech deficits and is very sociable. At 22 years of age she could still walk independently, but needed handrail support when going up and down stairs. Strength evaluation showed moderate proximal weakness of upper limbs and moderate-severe proximal and distal weakness of lower limbs with initial retractions of adductor muscles and Achilles tendons. Due to a fall resulting in a femur fracture at age 28, she is now wheelchair-bound.

S3 (Figure 1A, Table 1) is a 21-year-old male who also presented with delayed psychomotor development at 23 months after an uneventful pregnancy and delivery. Neurological examination at 3 years of age identified marked axial and limb hypotonia with proximal upper and lower limb weakness, marked lumbar hyperlordosis, and areflexia. Gower's sign was positive. CK was elevated often above 1,000 U/L and muscle biopsy showed neuro-myogenic changes. A mild increase of perimysial connective tissue was noted with variable fiber size with hyper-, hypo-, and atrophic fibers, a few centrally located nuclei, split fibers, rare degenerating fibers, and small type groupings (Gomori trichrome staining, Figure 2B).  $\alpha$ -dystroglycan immunohistochemistry showed reduced glycosylation expression on fiber surfaces (Figure 2C), while dystrophin, dystrophin-associated glycoproteins, and laminin- $\alpha 2$  were normally expressed. He was moderately dysmorphic with an elongated face. Mild ID and microcephaly were noted, but brain MRI was normal. During subsequent years

muscle weakness slowly worsened with loss of autonomous gait at age 12. No cardiac impairment was noticed at echocardiographic examinations, while a mild restrictive respiratory deficiency was noticed since adolescence. No eye involvement was reported until the last visit at age 21.

S2 and S3 underwent exome sequencing as part of a cohort of Italian case subjects with CMD with variable brain abnormalities and cognitive deficits (see Table S1 for details on exome). Exomes were filtered using custom SQL queries for rare (<0.5% frequency in the ExAC Browser for both total and non-Finnish European populations) and likely pathogenic (missense, splicing, or truncating) variants.<sup>19</sup> Remaining variants were visually analyzed on the Integrative Genomics Viewer (IGV),<sup>20</sup> leading to three candidate genes in S2 and three candidates in S3 (Table S2). Both individuals had biallelic missense variants in *INPP5K* (Figures 1A and 1B). S2 carries compound heterozygous transitions c.67G>A (p.Val23Met) and c.805G>A (p.Asp269Asn), while S3 is homozygous for c.67G>A (Table S3). Both variants affect conserved residues (Figure 1C), found in less than 1:100,000 alleles in the ExAC and gnomAD browsers and are predicted to be pathogenic (p.Val23Met: SIFT = 0; PolyPhen2 = 1; CADD = 16.7; p.Asp269Asn: SIFT = 0; PolyPhen2 = 1; CADD = 34) (Table S3).

Finally, subject 4 (S4, Figure 1A, Table 1) originated from the United States and was referred to us via GeneMatcher<sup>21,22</sup> after clinical exome sequencing in the trio (proband and parents). She is a 17-year-old female who presented in early childhood with delay in reaching motor and cognitive developmental milestones. She walked independently at 18 months. She did not babble until age 3 and had phrases at age 4. Bilateral cataracts were identified at 2 years of age and surgically corrected. Since childhood she had upper and lower limb hypotonia, leading to balance problems and frequent falls. CK is elevated above 1,000. Currently, she has an appreciable loss of muscle mass in her hands and feet. She toe walks and fatigues easily. EMG at 16 years of age was normal. A muscle biopsy has not been performed. She has short

stature for which she was treated with growth hormone. Other findings include hirsutism, microcephaly, and moderate ID. Brain MRI at age 16 was normal. Clinical exome sequencing was performed by GeneDX using proprietary capture chemistry (Table S1 for details). Further analysis identified *INPP5K* as the gene most likely to harbor the responsible pathogenic variants. S4 carries a likely pathogenic transition and a small deletion in compound heterozygosity, c.418G>A (p.Gly140Ser; SIFT = 0; PolyPhen2 = 1; CADD = 28.6) and c.1251\_1252delCA (p.Asn417Lysfs\*26) (Figures 1A and 1B). The missense variant alters a conserved residue and is extremely rare; the deletion is not found in ExAC and gnomAD browsers (Table S3).

In summary, all individuals with likely pathogenic biallelic mutations in *INPP5K* present with myopathic findings and elevated CK, short stature, motor and cognitive developmental delay since early infancy, and moderate-severe ID. Cataracts were present in S1.1, S2, and S4, but not S1.1's sibling S1.2, showing variability even within the same family. While no ataxia or cerebellar atrophy was noted, this presentation is reminiscent of MSS and could fall in the larger MSS spectrum.<sup>23</sup> In addition, a reduction in dystroglycan glycosylation in S2 and S3 suggest an overlap with less severe forms of dystroglycanopathies, where CMD is present with cataracts and ID.<sup>6,7</sup> Similar cases of merosin-positive CMD with cataracts and ID have been previously reported,<sup>24,25</sup> also suggesting that this disorder may represent a distinct clinical entity.

Since the identified variants are either missense or late truncations, we sought to determine their impact on protein function by performing phosphatase activity assays. GST-tagged full-length *INPP5K* constructs (wild-type and mutants) were assayed for their activity against 135 mM PtdIns(4,5)P<sub>2</sub>diC8 soluble lipid substrate in phosphatase assay buffer (50 mM Tris-HCl [pH 7.5], 150 mM NaCl, 10 mM MgCl<sub>2</sub>). Free phosphate was measured using the malachite green assay kit (Echelon Biosciences) and calibrated against standards according to the manufacturer's instructions. To minimize variability between purifications, all constructs were freshly prepared and purified in parallel for each experiment, and beads used in the assay were afterward run on Coomassie gels to confirm equal protein loading. We found that when compared to a phosphatase-dead construct (p.Asp310Gly), p.Gly140Ser and p.Asp269Asn had almost no enzymatic activity, while p.Val23Met and p.Met93Val retained 27% and 42% activity, respectively. The C-terminal frameshift deletion p.Asn417Lysfs\*26, which is located outside of the phosphatase domain, was the least severely disrupted (57% activity in this assay) (Figure 1D). Both S1.1/2 and S3 are homozygous for variants that only partially reduce phosphatase activity of *INPP5K*, but analysis of more case subjects will be necessary to establish genotype/phenotype correlation.

To explore the role of *INPP5K* during early development, we targeted *inpp5k* in the zebrafish embryo using antisense

morpholino oligonucleotides (MOs, GeneTools, LLC). Teleost fish underwent a genome duplication event, leading to approximately 30% of genes having a paralog.<sup>26</sup> *inpp5k* is present in two copies in the zebrafish genome: *inpp5ka* and *inpp5kb*. Alignment of both homologs indicate that *inpp5ka* is more similar to *INPP5K* (Figure S1), suggesting that it is the closest ortholog of the human gene. In addition, quantitative PCR expression analysis in the zebrafish embryo indicated that *inpp5ka* expression is, respectively, 7-fold and 16-fold higher than *inpp5kb* at 1 and 2 days post fertilization (dpf) (Figure S1B). MOs were designed by two independent groups to target both the start site (translation-blocking) and splicing of the *inpp5ka* and *b* mRNA, leading to four independent MOs being tested for each gene (Table S4, Figures 3 and S2–S4). Experiments were also performed on two independent strains, TupLF and AB.

Injections of *inpp5ka* MOs in the fertilized oocyte resulted in a striking phenotype in zebrafish embryos and larvae, which featured microphthalmia, microcephaly, curved and shortened body, and reduced touch-evoked motility (Figures 3A and S2–S4, Movies S1, S2, S3, S4, and S5). This phenotype was consistent across all *inpp5ka* MOs injections and in the *inpp5ka* and *b* double morphant, while *inpp5kb* MOs alone showed very mild phenotypes (Figures S2A–S2D and S4). It is not uncommon for one gene in a pair of duplicated orthologs to lose its function or be silenced.<sup>27</sup> Therefore, all subsequent analysis was performed on *inpp5ka* morphants to reduce as much as possible the amount of MO injected in the embryos and avoid non-specific effects. *inpp5ka* morphant phenotypes could be significantly improved by co-injection of 200 pg of capped human *INPP5K* mRNA, while injection of *INPP5K* mRNA alone had no effect (Figures S2E and S2F).

Examination of the eye by wax sectioning followed by H&E staining showed that in morphants eyes are orientated downward, as indicated by the position of the lens (Figure 3B). At 3 dpf the lens organizes in a cellular cortex and an acellular nucleus.<sup>28</sup>  $\alpha$ -crystallin (zl-1; Zebrafish International Resource Center) immunostaining in axial sections of the *inpp5ka* morphant showed that the lens cortex was disorganized and cell nuclei were present in the center of the lens nucleus, leading to a phenotype reminiscent of congenital cataracts (Figure 3C).

A birefringence assay using polarized light to image the densely packed and highly organized nature of muscle fibers of control embryos showed that knockdown of *inpp5ka* caused a substantial reduction in birefringence (Figure 3D), suggesting muscle fiber disorganization. To better evaluate skeletal muscle structure, phalloidin (Molecular Probes) was used to mark filamentous actin (F-actin) in sarcomeres. Control embryos display densely packed, organized muscle fibers in the trunk of the zebrafish embryo (Figure 3E). *inpp5ka* morphants showed sparser, disorganized myofibers, with the appearance of "wavy fibers" (Figure 3E). As the role of *INPP5K* has not been previously characterized, we investigated its potential

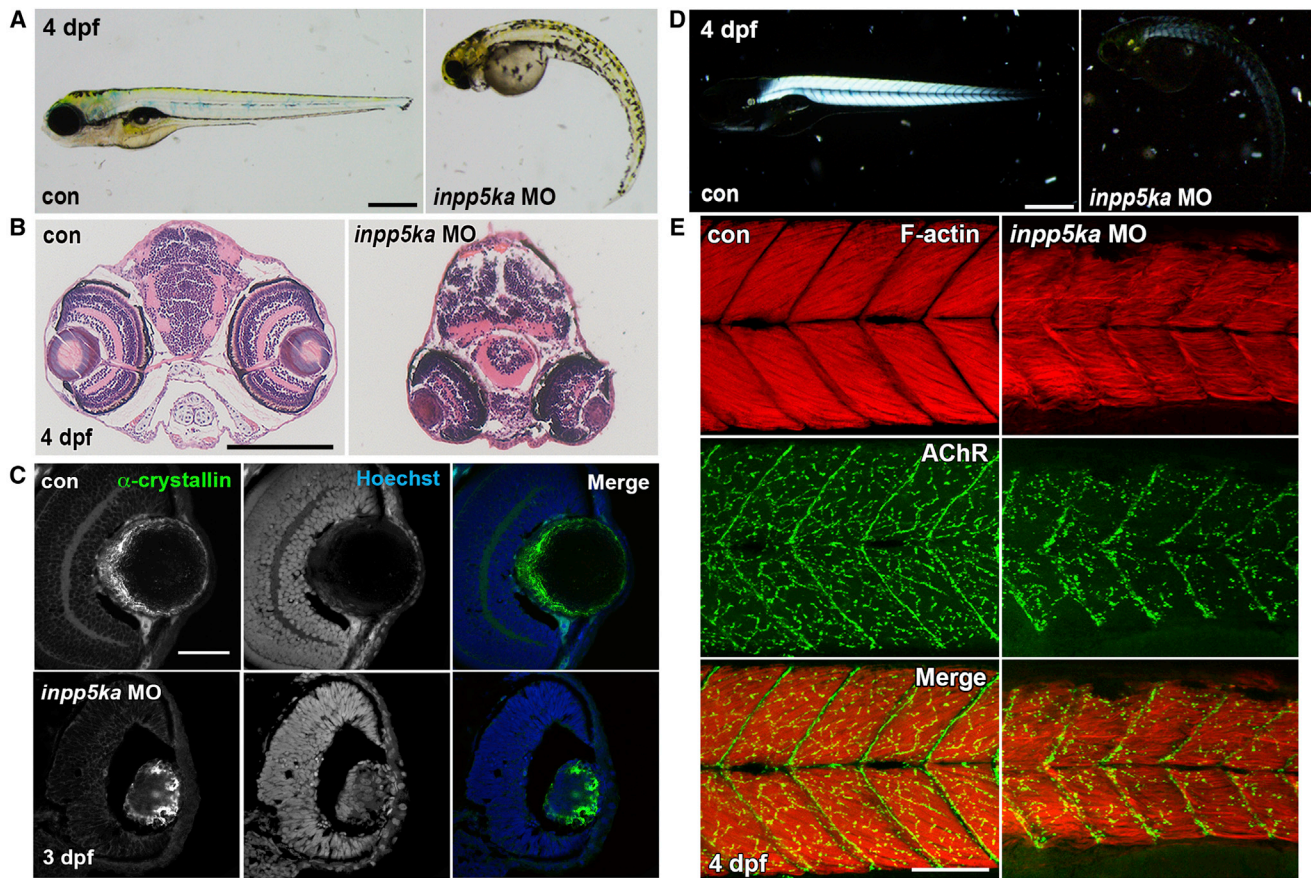

**Figure 3. Knockdown of *inpp5ka* in Zebrafish Causes Defective Eye Development and Muscle Formation**

(A) General morphological abnormalities were observed in *inpp5ka* morphant embryos at 4 dpf, compared to control morpholino (MO) or uninjected control age-matched embryos. Scale bar represents 500  $\mu\text{m}$ .  
 (B) Aberrant eye development was observed in *inpp5ka* morphant wax sections stained with H&E; eyes were observed reduced in size and downwardly oriented. Scale bar represents 200  $\mu\text{m}$ .  
 (C) Structural analysis of the lens, by staining for  $\alpha$ -crystallin, identifies disorganization in *inpp5ka* morphant embryos. In addition, abnormal medial nuclei retention was observed in *inpp5ka* morphant lens, as marked by DNA stain Hoechst. Scale bar represents 50  $\mu\text{m}$ .  
 (D) Birefringence of *inpp5ka* morphant embryos reveals decreased muscle integrity compared to uninjected or control MO-injected embryos at 4 dpf. Scale bar represents 200  $\mu\text{m}$ .  
 (E) Analysis of muscle fiber and neuromuscular junction formation using Phalloidin (Red, F-actin) and alpha-Bungarotoxin (Green, AChR), respectively, reveals misaligned myofibers and reduced NMJ arborization in morphants. Scale bar represents 100  $\mu\text{m}$ .

role in the formation of neuromuscular junctions (NMJs). Analysis of NMJs, by targeting the acetylcholine receptors (AChR) using the high-affinity fluorophore-conjugated alpha-Bungarotoxin (Molecular Probes), reveals reduced synaptic formation in the skeletal muscle of *inpp5ka* knockdown embryos (Figure 3E). Thus, *inpp5ka* is required for appropriate formation of skeletal muscles and NMJs.

Finally, transmission electron microscopy (TEM) was used to expose sarcomeric assembly defects consistent with reduced motility in the morphants (Figure 4A). While control embryos display clearly defined electron dense anisotropic (A-bands) and less dense isotropic (I-bands) bands, the morphants have undefined A- and I-bands (Figure 4B). Sarcomere length is shorter in *inpp5ka* knockdown embryos, compared to control MO-injected or uninjected embryos, a phenotype normally associated with contracted sarcomeres. In addition, myofibrils are loosely packed with a disorganized arrangement in morphants.

Triads, consisting of T-tubules and sarcoplasmic reticulum (SR), are required for sarcomeric contraction. Knockdown of *inpp5ka* results in triads that are on average half the size of those in control embryos (Figures 4C–4E), a possible feature of an exhausted SR.<sup>29</sup> Muscular dystrophy phenotypes are associated with detachment of myofibers at somite borders.<sup>30</sup> We analyzed muscle fiber attachment at the somite borders in knockdown and control embryos (Figure 4C). Control embryos showed well-defined attachments to the myoseptum, which were reduced in morphant embryos. Muscle fiber detachments were not observed in the F-actin immunofluorescent staining, suggesting that although the myoseptal attachments are present, they may be weaker. Taken together, these data suggest that *inpp5ka* is required for appropriate sarcomere assembly and function.

In summary, we identified five independent alleles in *INPP5K* leading to a disorder characterized by short

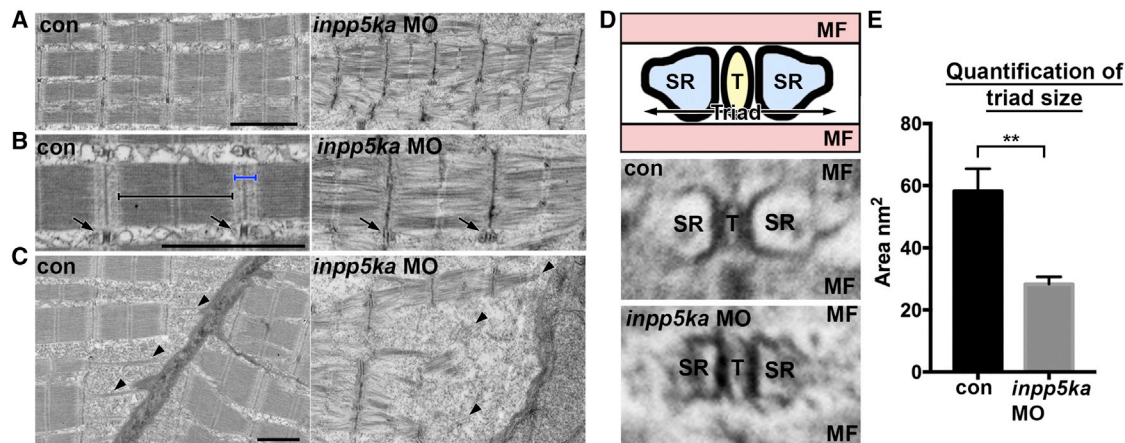

**Figure 4. Zebrafish Loss of *inpp5ka* Results in Disorganized Myofibrils and Insufficient Sarcomere Assembly, as Analyzed by Transmission Electron Microscopy**

(A) Assessment of sarcomere assembly at the ultrastructural level shows less compact myofibrils, short sarcomere length, and undefined regional divisions. Scale bar represents 2  $\mu$ m.

(B) High-magnification image of sarcomere assembly indicates the loss of defined anisotropic (black bracket) and isotropic (blue bracket) bands in morphant embryos. T-tubules are also notably smaller than control embryos (arrows). Scale bar represents 2  $\mu$ m.

(C) Muscle fiber attachments at the somite borders presented disorganized and weak unions with the myoseptum in morphant embryos. Scale bar represents 1  $\mu$ m.

(D) Top panel shows a schematic diagram of the Triad assembly, composed of the sarcoplasmic reticulum (SR) and T-tubule (T) sandwiched between muscle fibers (MF). Middle and lower panels show representative triad morphology for control and *inpp5ka* morphant fish, respectively.

(E) Triad size was quantified using the combined area of SR and T per triad. Con  $58.2 \pm \text{SEM } 7.254$ ;  $n = 10$ , *inpp5ka*MO  $28.3 \pm \text{SEM } 2.371$ ;  $n = 10$ .  $**p \leq 0.01$ , as analyzed by an unpaired t test.

stature, ID, CMD, and cataracts. *inpp5k* loss-of-function modeling in the zebrafish led to a constellation of phenotypes that closely resembles the human presentation, including reduced growth, microcephaly, lens disorganization, reduced motility, and myopathy. The clinical presentation partially overlaps with MSS, and with at least two subjects showing a reduction in dystroglycan glycosylation, suggests a continuum with the dystroglycanopathies. This combination of phenotypes could be explained both by INPP5K enzymatic function and by its binding partners in the ER. Because of its role in converting PIP<sub>2</sub>, INPP5K has been shown to promote myoblast differentiation by controlling the myogenic loop triggered by insulin-growth factor II (IGF-II) through the PI3K-AKT-mTOR pathway.<sup>31</sup> Little is known about the role of INPP5K in the brain, but IGF-II activity is also critical for learning and memory consolidation.<sup>32</sup> It is possible that changes in AKT-mTOR activity in the brain will contribute to cognitive deficits as this signaling pathway has been found disrupted in multiple neurodevelopmental disorders.<sup>33</sup> In addition, INPP5K's signaling activity is directly regulated by its binding partner HSPA5/BiP,<sup>15,34</sup> which is in turn regulated by the MSS-associated gene *SIL1*.<sup>11</sup> *SIL1* regulates the activation stage of HSPA5/BiP in the ER and BiP is a critical chaperone for trafficking of glycoproteins.<sup>11</sup> Therefore, INPP5K could alter dystroglycan targeting by altering HSPA5/BiP function. Future studies must address the role of INPP5K in signaling regulation and glycoprotein trafficking during brain and muscle development.

#### Supplemental Data

Supplemental Data include four figures, four tables, and five movies and can be found with this article online at <http://dx.doi.org/10.1016/j.ajhg.2017.01.019>.

#### Acknowledgments

First and foremost, we thank the families who enrolled in our studies and the physicians who have contributed families. The EuroBioBank and Telethon Network Genetic Biobanks (project no. GTB12001F) are acknowledged for providing biological samples. We are also grateful to Meghan Cho (GeneDX) for coordinating release of sequencing information, Chris Walsh (Boston Children's Hospital) for logistical help in sample collection, and Jan Senderek (Universität München) for providing plasmids for protein function studies. This work was supported by the Manton Center for Orphan Disease Research (M.C.M.), the Muscular Dystrophy Association (research grant 293587 to M.C.M.), the March of Dimes (research grant 6-FY14-422 to M.C.M.), the Wellcome Trust Institutional Strategic Support Fund (105616/Z/14/Z to L.E.S.), and the Medical Research Council (MRC/N010035/1 to L.E.S.). Zebrafish work was supported by ZebSolutions. This publication was also supported by Award Number UL1TR001876 from the NIH National Center for Advancing Translational Sciences. Its contents are solely the responsibility of the authors and do not necessarily represent the official views of the National Center for Advancing Translational Sciences or the NIH.

Received: October 17, 2016

Accepted: January 5, 2017

Published: February 9, 2017

## Web Resources

ANNOVAR, <http://annovar.openbioinformatics.org/en/latest/>  
Ensembl Genome Browser, <http://www.ensembl.org/index.html>  
ExAC Browser, <http://exac.broadinstitute.org/>  
FANTOM5, <http://fantom.gsc.riken.jp/5/>  
GenBank, <http://www.ncbi.nlm.nih.gov/genbank/>  
GME Variome, <http://igm.ucsd.edu/gme>  
gnomAD Browser, <http://gnomad.broadinstitute.org/>  
NCBI HomoloGene, <http://www.ncbi.nlm.nih.gov/homologene>  
OMIM, <http://www.omim.org/>  
PolyPhen-2, <http://genetics.bwh.harvard.edu/pph2/>  
SIFT, <http://sift.bii.a-star.edu.sg/>  
ZebSolutions, <http://zebsolutions.co.uk/>

## References

1. Kang, P.B., Morrison, L., Iannaccone, S.T., Graham, R.J., Bönnemann, C.G., Rutkowski, A., Hornyak, J., Wang, C.H., North, K., Oskoui, M., et al.; Guideline Development Subcommittee of the American Academy of Neurology and the Practice Issues Review Panel of the American Association of Neuromuscular & Electrodiagnostic Medicine (2015). Evidence-based guideline summary: evaluation, diagnosis, and management of congenital muscular dystrophy: Report of the Guideline Development Subcommittee of the American Academy of Neurology and the Practice Issues Review Panel of the American Association of Neuromuscular & Electrodiagnostic Medicine. *Neurology* 84, 1369–1378.
2. Bönnemann, C.G., Wang, C.H., Quijano-Roy, S., Deconinck, N., Bertini, E., Ferreiro, A., Muntoni, F., Sewry, C., Béroud, C., Mathews, K.D., et al.; Members of International Standard of Care Committee for Congenital Muscular Dystrophies (2014). Diagnostic approach to the congenital muscular dystrophies. *Neuromuscul. Disord.* 24, 289–311.
3. Manzini, M.C., and Walsh, C.A. (2011). What disorders of cortical development tell us about the cortex: one plus one does not always make two. *Curr. Opin. Genet. Dev.* 21, 333–339.
4. Mercuri, E., and Muntoni, F. (2012). The ever-expanding spectrum of congenital muscular dystrophies. *Ann. Neurol.* 72, 9–17.
5. Wells, L. (2013). The o-mannosylation pathway: glycosyltransferases and proteins implicated in congenital muscular dystrophy. *J. Biol. Chem.* 288, 6930–6935.
6. Mercuri, E., Messina, S., Bruno, C., Mora, M., Pegoraro, E., Comi, G.P., D'Amico, A., Aiello, C., Biancheri, R., Berardinelli, A., et al. (2009). Congenital muscular dystrophies with defective glycosylation of dystroglycan: a population study. *Neurology* 72, 1802–1809.
7. Carss, K.J., Stevens, E., Foley, A.R., Cirak, S., Riemersma, M., Torelli, S., Hoischen, A., Willer, T., van Scherpenzeel, M., Moore, S.A., et al.; UK10K Consortium (2013). Mutations in GDP-mannose pyrophosphorylase B cause congenital and limb-girdle muscular dystrophies associated with hypoglycosylation of  $\alpha$ -dystroglycan. *Am. J. Hum. Genet.* 93, 29–41.
8. Senderek, J., Krieger, M., Stendel, C., Bergmann, C., Moser, M., Breitbach-Faller, N., Rudnik-Schöneborn, S., Blaschek, A., Wolf, N.I., Harting, I., et al. (2005). Mutations in *SIL1* cause Marinesco-Sjögren syndrome, a cerebellar ataxia with cataract and myopathy. *Nat. Genet.* 37, 1312–1314.
9. Krieger, M., Roos, A., Stendel, C., Claeys, K.G., Sonmez, F.M., Baudis, M., Bauer, P., Bornemann, A., de Goede, C., Dufke, A., et al. (2013). *SIL1* mutations and clinical spectrum in patients with Marinesco-Sjögren syndrome. *Brain* 136, 3634–3644.
10. Reinhold, A., Scheer, I., Lehmann, R., Neumann, L.M., Michael, T., Varon, R., and Von Moers, A. (2003). MR imaging features in Marinesco-Sjögren syndrome: severe cerebellar atrophy is not an obligatory finding. *AJNR Am. J. Neuroradiol.* 24, 825–828.
11. Behnke, J., Feige, M.J., and Hendershot, L.M. (2015). BiP and its nucleotide exchange factors Grp170 and Sil1: mechanisms of action and biological functions. *J. Mol. Biol.* 427, 1589–1608.
12. Gurung, R., Tan, A., Ooms, L.M., McGrath, M.J., Huysmans, R.D., Munday, A.D., Prescott, M., Whistock, J.C., and Mitchell, C.A. (2003). Identification of a novel domain in two mammalian inositol-polyphosphate 5-phosphatases that mediates membrane ruffle localization. The inositol 5-phosphatase skip localizes to the endoplasmic reticulum and translocates to membrane ruffles following epidermal growth factor stimulation. *J. Biol. Chem.* 278, 11376–11385.
13. Ijuin, T., Mochizuki, Y., Fukami, K., Funaki, M., Asano, T., and Takenawa, T. (2000). Identification and characterization of a novel inositol polyphosphate 5-phosphatase. *J. Biol. Chem.* 275, 10870–10875.
14. Lizio, M., Harshbarger, J., Shimoji, H., Severin, J., Kasukawa, T., Sahin, S., Abugessaisa, I., Fukuda, S., Hori, F., Ishikawa-Kato, S., et al.; FANTOM consortium (2015). Gateways to the FANTOM5 promoter level mammalian expression atlas. *Genome Biol.* 16, 22.
15. Ijuin, T., Hatano, N., and Takenawa, T. (2016). Glucose-regulated protein 78 (GRP78) binds directly to PIP3 phosphatase SKIP and determines its localization. *Genes Cells* 21, 457–465.
16. Scott, E.M., Halees, A., Itan, Y., Spencer, E.G., He, Y., Azab, M.A., Gabriel, S.B., Belkadi, A., Boisson, B., Abel, L., et al.; Greater Middle East Variome Consortium (2016). Characterization of Greater Middle Eastern genetic variation for enhanced disease gene discovery. *Nat. Genet.* 48, 1071–1076.
17. Lek, M., Karczewski, K.J., Minikel, E.V., Samocha, K.E., Banks, E., Fennell, T., O'Donnell-Luria, A.H., Ware, J.S., Hill, A.J., Cummings, B.B., et al.; Exome Aggregation Consortium (2016). Analysis of protein-coding genetic variation in 60,706 humans. *Nature* 536, 285–291.
18. Kircher, M., Witten, D.M., Jain, P., O'Roak, B.J., Cooper, G.M., and Shendure, J. (2014). A general framework for estimating the relative pathogenicity of human genetic variants. *Nat. Genet.* 46, 310–315.
19. Manzini, M.C., Tambunan, D.E., Hill, R.S., Yu, T.W., Maynard, T.M., Heinzen, E.L., Shianna, K.V., Stevens, C.R., Partlow, J.N., Barry, B.J., et al. (2012). Exome sequencing and functional validation in zebrafish identify *GTDC2* mutations as a cause of Walker-Warburg syndrome. *Am. J. Hum. Genet.* 91, 541–547.
20. Robinson, J.T., Thorvaldsdóttir, H., Winckler, W., Guttman, M., Lander, E.S., Getz, G., and Mesirov, J.P. (2011). Integrative genomics viewer. *Nat. Biotechnol.* 29, 24–26.
21. Sobreira, N., Schiettecatte, F., Valle, D., and Hamosh, A. (2015). GeneMatcher: a matching tool for connecting investigators with an interest in the same gene. *Hum. Mutat.* 36, 928–930.



22. Sobreira, N., Schiettecatte, F., Boehm, C., Valle, D., and Hamosh, A. (2015). New tools for Mendelian disease gene identification: PhenoDB variant analysis module; and GeneMatcher, a web-based tool for linking investigators with an interest in the same gene. *Hum. Mutat.* *36*, 425–431.
23. Ezgu, F., Krejci, P., Li, S., de Sousa, C., Graham, J.M., Jr., Hansmann, I., He, W., Porpora, K., Wand, D., Wertelecki, W., et al. (2014). Phenotype-genotype correlations in patients with Marinesco-Sjögren syndrome. *Clin. Genet.* *86*, 74–84.
24. Reed, U.C., Tsanaclis, A.M., Vainzof, M., Marie, S.K., Carvalho, M.S., Roizenblatt, J., Pedreira, C.C., Diament, A., and Levy, J.A. (1999). Merosin-positive congenital muscular dystrophy in two siblings with cataract and slight mental retardation. *Brain Dev.* *21*, 274–278.
25. Topaloğlu, H., Yetük, M., Talim, B., Akçören, Z., and Çağlar, M. (1997). Merosin-positive congenital muscular dystrophy with mental retardation and cataracts: a new entity in two families. *Eur. J. Paediatr. Neurol.* *1*, 127–131.
26. Howe, K., Clark, M.D., Torroja, C.F., Torrance, J., Berthelot, C., Muffato, M., Collins, J.E., Humphray, S., McLaren, K., Matthews, L., et al. (2013). The zebrafish reference genome sequence and its relationship to the human genome. *Nature* *496*, 498–503.
27. Lynch, M., and Conery, J.S. (2000). The evolutionary fate and consequences of duplicate genes. *Science* *290*, 1151–1155.
28. Greiling, T.M.S., and Clark, J.I. (2009). Early lens development in the zebrafish: a three-dimensional time-lapse analysis. *Dev. Dyn.* *238*, 2254–2265.
29. Paolini, C., Quarta, M., Nori, A., Boncompagni, S., Canato, M., Volpe, P., Allen, P.D., Reggiani, C., and Protasi, F. (2007). Reorganized stores and impaired calcium handling in skeletal muscle of mice lacking calsequestrin-1. *J. Physiol.* *583*, 767–784.
30. Gupta, V., Kawahara, G., Gundry, S.R., Chen, A.T., Lencer, W.I., Zhou, Y., Zon, L.I., Kunkel, L.M., and Beggs, A.H. (2011). The zebrafish *dag1* mutant: a novel genetic model for dystroglycanopathies. *Hum. Mol. Genet.* *20*, 1712–1725.
31. Ijuin, T., and Takenawa, T. (2012). Role of phosphatidylinositol 3,4,5-trisphosphate (PIP3) 5-phosphatase skeletal muscle- and kidney-enriched inositol polyphosphate phosphatase (SKIP) in myoblast differentiation. *J. Biol. Chem.* *287*, 31330–31341.
32. Chen, D.Y., Stern, S.A., Garcia-Osta, A., Saunier-Rebori, B., Poltonini, G., Bambah-Mukku, D., Blitzer, R.D., and Alberini, C.M. (2011). A critical role for IGF-II in memory consolidation and enhancement. *Nature* *469*, 491–497.
33. Lipton, J.O., and Sahin, M. (2014). The neurology of mTOR. *Neuron* *84*, 275–291.
34. Ijuin, T., Hatano, N., Hosooka, T., and Takenawa, T. (2015). Regulation of insulin signaling in skeletal muscle by PIP3 phosphatase, SKIP, and endoplasmic reticulum molecular chaperone glucose-regulated protein 78. *Biochim. Biophys. Acta* *1853*, 3192–3201.

**Supplemental Data**

**Mutations in *INPP5K* Cause a Form of  
Congenital Muscular Dystrophy Overlapping  
Marinesco-Sjögren Syndrome and Dystroglycanopathy**

**Daniel P.S. Osborn, Heather L. Pond, Neda Mazaheri, Jeremy Dejardin, Christopher J. Munn, Khaloob Mushref, Edmund S. Cauley, Isabella Moroni, Maria Barbara Pasanisi, Elizabeth A. Sellars, R. Sean Hill, Jennifer N. Partlow, Rebecca K. Willaert, Jaipreet Bharj, Reza Azizi Malamiri, Hamid Galehdari, Gholamreza Shariati, Reza Maroofian, Marina Mora, Laura E. Swan, Thomas Voit, Francesco J. Conti, Yalda Jamshidi, and M. Chiara Manzini**

## Supplemental Material

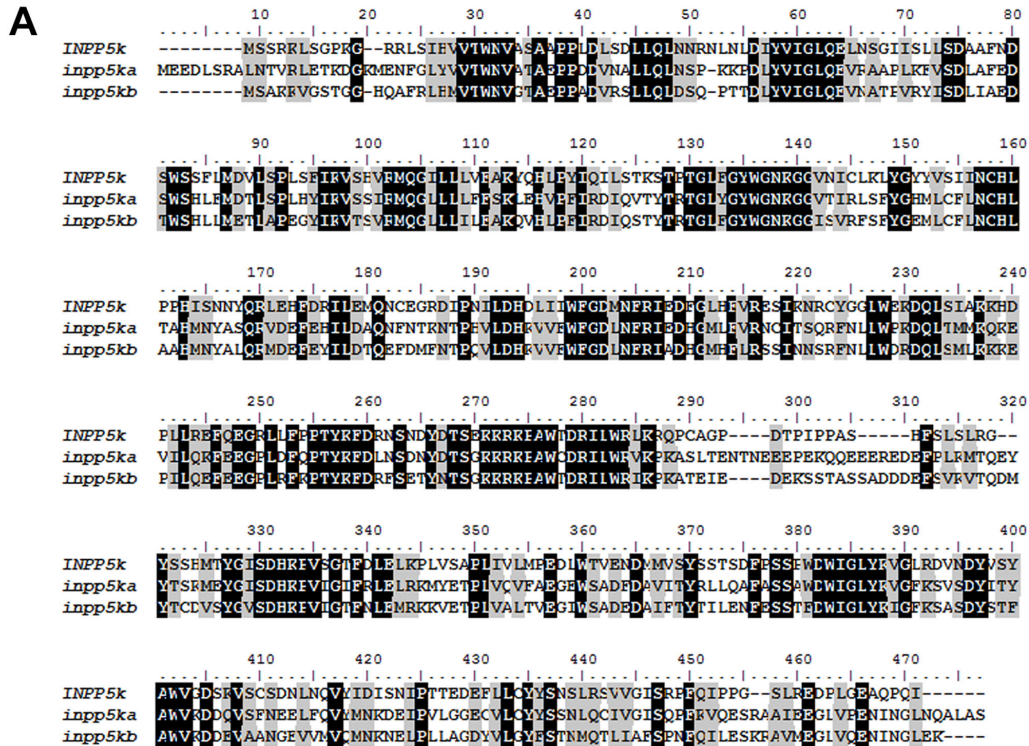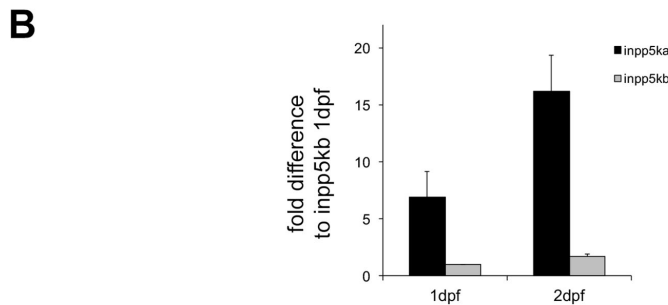

**Supplemental Figure 1. A.** Protein alignment of INPP5K with *inpp5ka* and *inpp5kb* showing that protein conservation is higher for *inpp5ka*. **B.** Quantitative PCR (qPCR) measurement of *inpp5ka* and *inpp5kb* expression on RNA extracted from zebrafish embryos at 1 and 2 dpf shows that *inpp5ka* expression is higher than *inpp5kb*. RNA was extracted from frozen embryos using ReliaPrep RNA Miniprep System (Promega). cDNA generated iScript Reverse Transcription Supermix (Bio-Rad) and qPCR was performed via a SYBR Green-based approach using Sso Fast EvaGreen Supermix (Bio-Rad) on a CFX 384 Real Time PCR Detection system (Bio-Rad).

PCR primers:

*inpp5ka* For GGAGTCACCTCTTCATGGAC; Rev TCCAGCTTGAAAAGAAAAG

*inpp5kb* For TGGGACTGGATTGGTTAT; Rev GCTCCTCATTGAAAGACACC

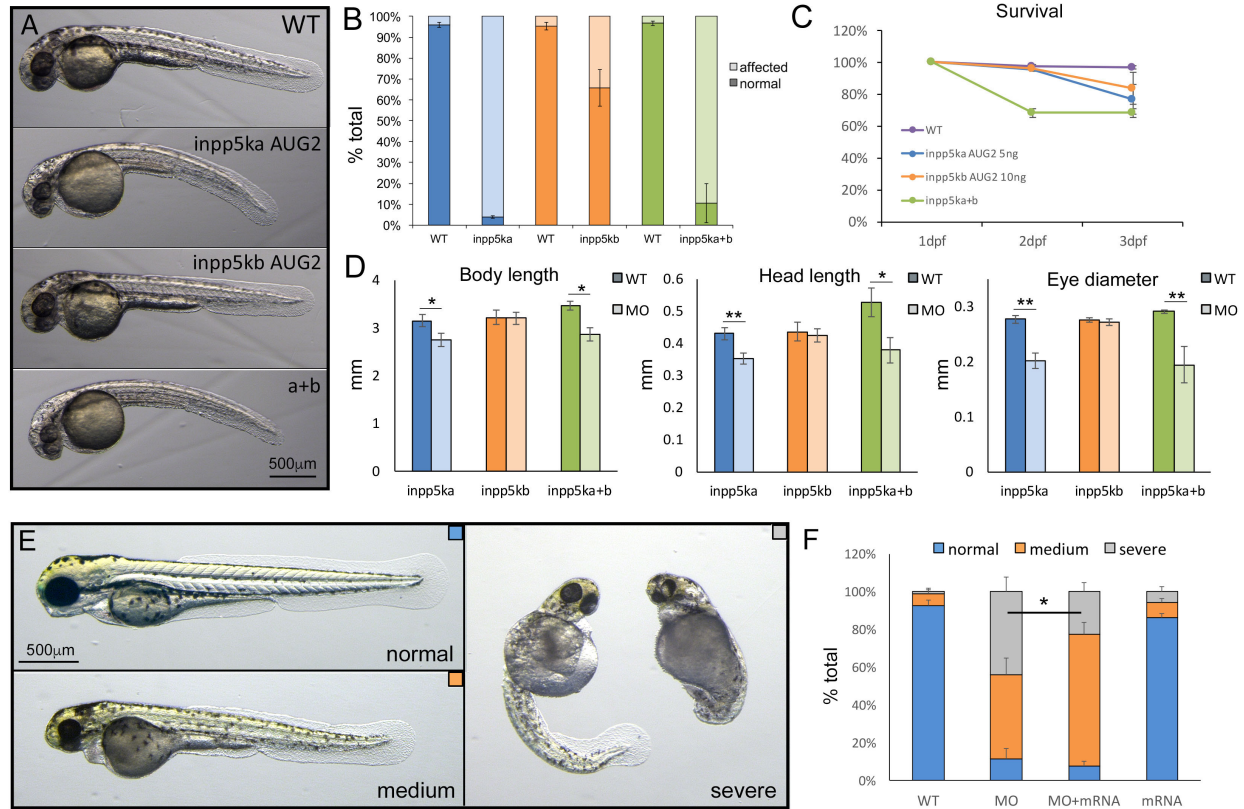

**Supplemental Figure 2. *inpp5ka* morphants shows a more severe phenotype than *inpp5kb* morphants**

**A.** Average presentation of 2 dpf embryos injected with 5ng *inpp5ka* AUG2 MO, 10ng *inpp5kb* AUG2 MO or a combination of the two MOs (5ng for *inpp5ka* and 10ng *inpp5kb*). Scale bar: 500 $\mu$ m **B.** Quantification across multiple independent injections of 50-150 embryos/condition showed that most *inpp5ka* AUG2 morphants are affected by 2 dpf, but *inpp5kb* AUG2 morphants are less severely affected. N= 6 for *inpp5ka*, 5 for *inpp5kb* and 3 for a+b. Data is shown as average $\pm$ s.e.m. **C.** Survival for the three MO injections. **D.** Quantification of total body length, head length from the most rostral point to the otic vesicle, and anterior to posterior eye diameter show that *inpp5ka* morphants and a+b morphants are equally affected, while *inpp5kb* morphants do not differ from uninjected clutch-mates. Darker shaded bar represents wild-type (WT) and lighter bar morphants (MO). Data is shown as average $\pm$ s.e.m. **E.** 3dpf phenotypes scored for rescue analysis showing examples of medium and severe morphants presentation. Scale bar: 500 $\mu$ m **F.** Quantification of 4 independent experiments shows that injecting 200pg of human *INPP5K* mRNA improves the *inpp5ka* morphants phenotype, while mRNA alone has no effect. One-way ANOVA followed by Tukey's post-hoc test indicates that phenotypic improvement between MO and rescue (MO+mRNA) is significant p=0.034. Data is shown as average $\pm$ s.e.m. *INPP5K* cDNA (clone BC004362, Transomic) was cloned into pCS2P+ (Addgene) and capped mRNA was generated using the mMessage mMachine SP6 Transcription kit (Ambion). For each experiment MO, mRNA and MO+mRNA injections were performed on oocytes from the same clutch. In double injections MO and mRNA were injected sequentially using the same needles and conditions employed for the single injections.

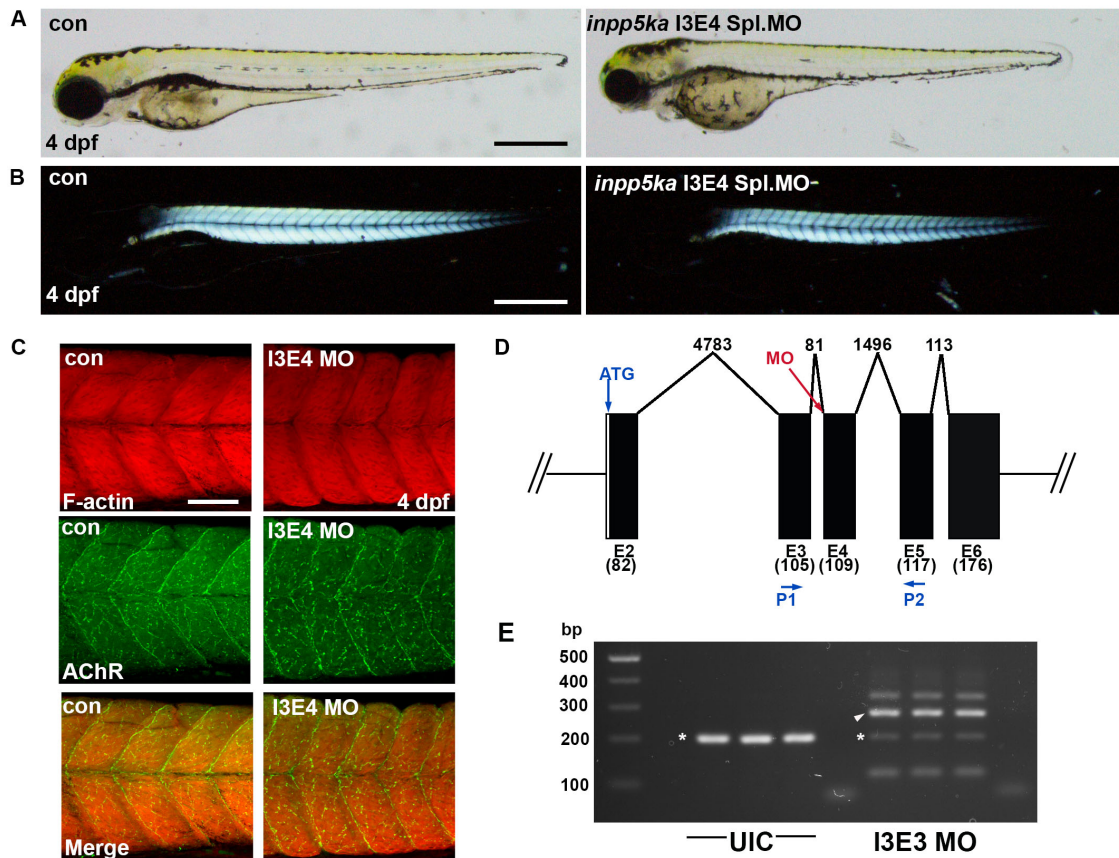

**Supplemental Figure 3. Knockdown of *inpp5ka* using a splice morpholino further confirms myogenic and ocular defects.** (A) Injections of a MO targeting the Intron3-Exon4 splice border causes defects in embryonic length and eye size. Scale bar: 500  $\mu$ m. (B) Birefringence analysis of skeletal muscle organization reveals reduced but not absent signal, myotomes are small with reduced chevron shaped appearance. Scale bar: 500  $\mu$ m. (C) F-actin (Red) staining of muscle fibers reveals reduction of myotome width and fiber disorganization. NMJs (Green) are present but notably more punctate in morphants compared to control embryos. Scale bar: 100  $\mu$ m. (D) Schematic representation of morpholino target site. (E) RT-PCR validation of gene specific morpholino knockdown shown for three groups of MO or control MO injected embryos at 48 hpf. Expected size of endogenous *inpp5ka* product: 204 bp (asterisk), predicted product size if Exon 4 excluded: 95 bp, predicted product size if intron 3 included: 285 bp (arrow head).

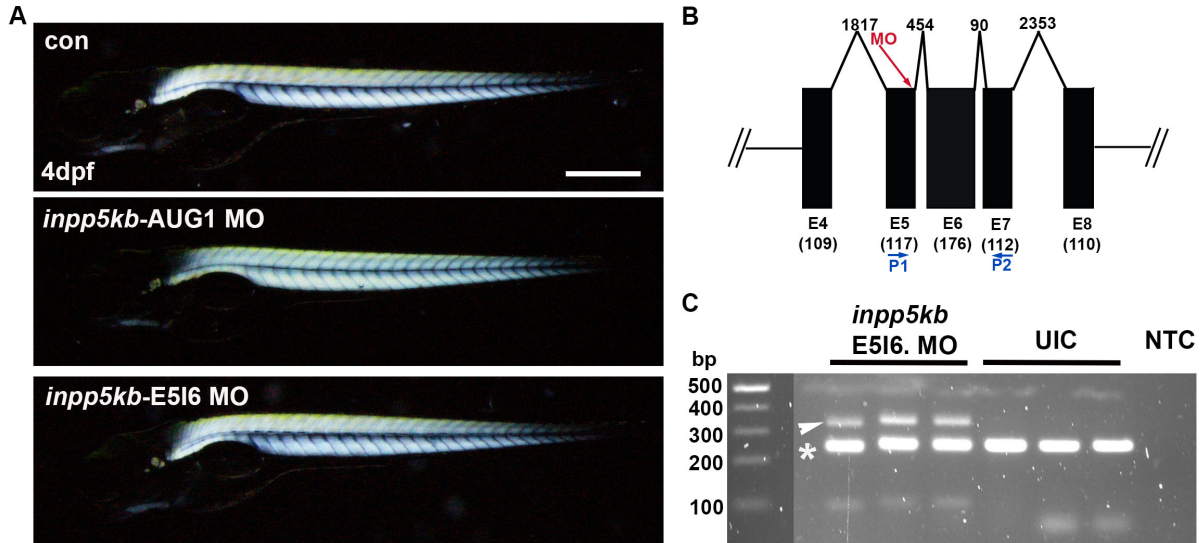

**Supplemental Figure 4. Morpholino knockdown of *inpp5kb* has no discernable effect on skeletal muscle integrity.** (A) Birefringence assay in control non-injected or standard MO treated embryos, compared to a translational blocking or splice inhibiting MOs at 4 dpf. Scale bar: 500  $\mu$ m. (B) Schematic representation of splice MO target site, at the exon5-intron6 splice border. Primers for RT-PCR knockdown were localized to exon 5 and exon7, forward and reverse, respectively. (C) RT-PCR showing the predicted endogenous PCR product of 274 bp (asterisks) and the presence of a second band in morphant embryos at 364 bp, (arrow head), consistent with an intron 6 inclusion, and premature stop codon. Experiments were completed on 3 independent injections. NTC: no template control.

PCR primers:

*inpp5kb* For: GTACATACACACGCACAGGC

*inpp5kb* Rev: CGGAGAAAGTGCATCCCATG

**Supplemental Table 1. Information on exome sequencing**

| ID          | Sequencing center                           | Instrument          | Library                                                                    | Exome capture                   | Reads       | Mapped reads | % Mapped | Mean coverage | Coverage 30X |
|-------------|---------------------------------------------|---------------------|----------------------------------------------------------------------------|---------------------------------|-------------|--------------|----------|---------------|--------------|
| <b>S1.1</b> | Otogenetics Corporation (Norcross, GA, USA) | Illumina HiSeq 2500 | SureSelect XT Target Enrichment                                            | SureSelect AllExon v5           | 37,899,311  | 37,728,210   | 99.55%   | 59.5          | 84.90%       |
| <b>S2</b>   | Broad Institute (Cambridge, MA, USA)        | Illumina HiSeq 2000 | SureSelect XT Target Enrichment                                            | SureSelect AllExon v2           | 107,223,634 | 64,252,668   | 86.13%   | 86.89         | 80.13%       |
| <b>S3</b>   | Broad Institute (Cambridge, MA, USA)        | Illumina HiSeq 2000 | SureSelect XT Target Enrichment                                            | SureSelect AllExon v2           | 131,302,974 | 98,035,909   | 92.30%   | 115.62        | 87.47%       |
| <b>S4</b>   | GeneDX (Gaithersburg, MD, USA)              | Illumina HiSeq 4000 | proprietary capture chemistry using Agilent Clinical Research Exome probes | Agilent Clinical Research Exome | 61,481,105  | 61,451,744   | 99.95%   | 117.34        | 93.18%       |

**Supplemental information on variant annotation methods**

**S1.1** - Reads were aligned to genome assembly hg19 with Burrows-Wheeler Aligner (BWA,V.0.5.87.5). High quality indel and single nucleotide variant calling and annotation were performed using GATK Lite 2.3.10 using standard filtering criteria (read depth  $\geq 10\%$ , genotype quality score  $\geq 30$ ). Candidate genes were prioritized by searching for homozygous variants with a minor allele frequency  $< 1\%$  in 300 in-house ethnically-matched Iranian control exomes, dbSNP, 1000 Genomes and ExAC.

**S2-3** - Reads were aligned to genome assembly hg19 with BWA and annotation was performed using GTAK as listed above. Data was loaded in a SQL database and was filtered for rare ( $< 1\%$  in 1000Genomes,  $< 1\%$  in Exome Variant Server), recessive (homozygous or compound heterozygous) and protein-altering (non synonymous, nonsense, frameshift, splicing) variants. Filtered variants were visually confirmed on IGV.

**S4** - DNA sequence was mapped to the published human genome build UCSC hg19/GRCh37 reference sequence using Burroughs Wheeler Aligner (BWA) with the latest internally validated version at the time of sequencing, progressing from BWA v0.5.8 through BWA-Mem v0.7.8. The variant interpretation protocol has been previously described (Tanaka et al., Am J Hum Genet, 2015. 97(3): p. 457-64)

**Supplemental Table 2. List of potential candidate genes identified by exome sequencing** See Excel file

**Supplemental Table 3. Estimation of pathogenic relevance for INPP5K mutations identified by exome sequencing**

Human INPP5K sequence IDs: GenBank transcript NM\_016532.3; GenBank Protein NP\_057616.2; UniProt Q9BT40; Ensembl transcript ENST00000421807; Ensembl protein ENSP00000413937.2

|                                  | <b>S1.1, S1.2</b> | <b>S2, S3</b>   | <b>S2</b>       | <b>S4</b>       | <b>S4</b>        |
|----------------------------------|-------------------|-----------------|-----------------|-----------------|------------------|
| <b>DNA change</b>                | c.277A>G          | c.67G>A         | c.805G>A        | c.418G>A        | c.1251-1252delCA |
| <b>Protein change</b>            | p.Met93Val        | p.Val23Met      | p.Asp269Asn     | p.Gly140Ser     | p.Asn417Lysfs*26 |
| <b>ExAc het/total</b>            | 0                 | 1/119,622       | 1/124,461       | 1/120,892       | 0                |
| <b>gnomAD het/total</b>          | 0                 | 2/251,228       | 2/250,742       | 3/252,326       | 0                |
| <b>SIFT prediction</b>           | damaging          | damaging        | damaging        | damaging        |                  |
| <b>score</b>                     | 0.01              | 0               | 0               | 0               |                  |
| <b>Polyphen2 prediction</b>      | benign            | damaging        | damaging        | damaging        |                  |
| <b>score</b>                     | 0.19              | 1               | 1               | 1               |                  |
| <b>MutationTaster prediction</b> | disease causing   | disease causing | disease causing | disease causing |                  |
| <b>score</b>                     | 0.999993771       | 1               | 1               | 1               |                  |
| <b>CADD score</b>                | 22.7              | 16.7            | 34              | 28.6            |                  |



**Supplemental Table 4. Morpholino oligonucleotide (MO) sequences**

| <b>MO name</b>                        | <b>MO sequence (5'&gt;3')</b> | <b>Target</b>     |
|---------------------------------------|-------------------------------|-------------------|
| <i>inpp5ka</i> (ENSDART00000169037.1) |                               |                   |
| inpp5ka-AUG1                          | CACGAGACAAATCTTCCTCCATCCT     | Start             |
| inpp5ka-I3E4                          | ACTGAAGAGGAGCAGCATTCAAACA     | Intron 3 - Exon 4 |
| inpp5ka-AUG2                          | GCACGAGACAAATCTTCCTCCATCC     | Start             |
| inpp5ka-I1E2                          | TCGCCTGTCAATCATAACATCGTGT     | Intron 1 - Exon 2 |
| <i>inpp5kb</i> (ENSDART00000148480.1) |                               |                   |
| inpp5kb-AUG1                          | CGCTCATACTCAAACCCTTCAGCCT     | Start             |
| inpp5kb-E5I6                          | ATAATAATGAACTGACTTGTGGTCT     | Exon 5 - Intron 6 |
| inpp5kb-AUG2                          | CTCAAACCCTTCAGCCTCGTCTAGC     | Start             |
| inpp5kb-I1E2                          | AAACCTGAGCACACAAACACCATGT     | Intron 1 - Exon 2 |
